# Supplementary material for: Disposable Voltammetric Immunosensor for D-Dimer Detection as Early Biomarker of Thromboembolic Disease and of COVID-19 Prognosis
Source: MDPI journal article supplement (doi:10.3390/bios13010043), 2022-12-28
Supplement: s1 [file s1]

## Supplementary Material

# Disposable Voltammetric Immunosensor for D-Dimer Detection as Early Biomarker of Thromboembolic Disease and of COVID-19 Prognosis

Cristina Tortolini <sup>1</sup>, Valeria Gigli <sup>1</sup>, Antonio Angeloni <sup>1</sup>, Luciano Galantini <sup>2</sup>, Federico Tasca <sup>3</sup>  
and Riccarda Antiochia <sup>4,\*</sup>

<sup>1</sup> Department of Experimental Medicine, “Sapienza”, University of Rome, V.le Regina Elena 324, 00166 Rome, Italy

<sup>2</sup> Department of Chemistry, “Sapienza”, University of Rome, P.le Aldo Moro 5, 00185 Rome, Italy

<sup>3</sup> Departamento de Química de los Materiales, Facultad de Química y Biología, Universidad de Santiago de Chile, Casilla 40, Correo 33, Sucursal Matucana, Santiago 9170022, Chile

<sup>4</sup> Department of Chemistry and Drug Technologies, “Sapienza”, University of Rome, P.le Aldo Moro 5, 00185 Rome, Italy

\* Correspondence: [riccarda.antiochia@uniroma1.it](mailto:riccarda.antiochia@uniroma1.it)

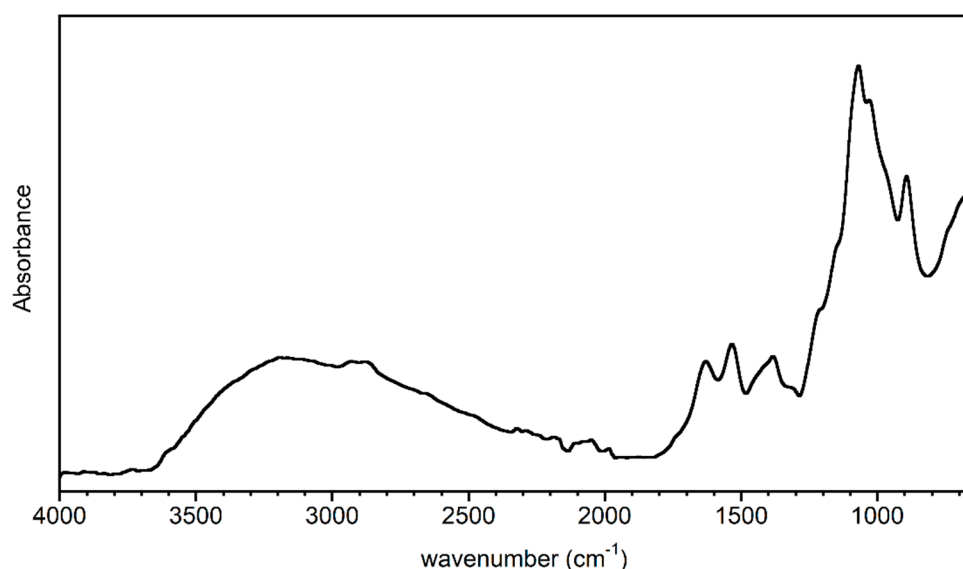

**Figure S1.** FTIR spectrum of freeze-dried CSNPs.

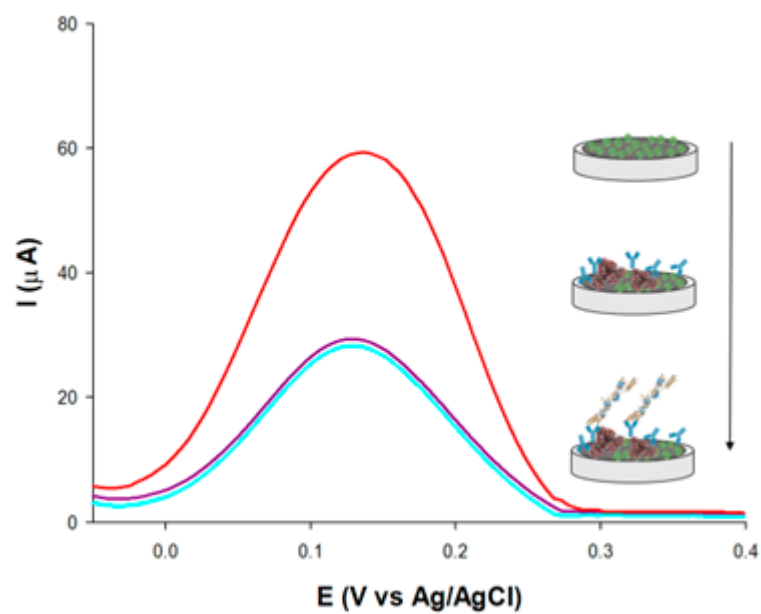

**Figure S2.** DPVs of: MWCNTs-CSNPs (red), MWCNTs-CSNPs-Ab-BSA (violet), MWCNTs-CSNPs-Ab-BSA-Ag (light blue) SPEs, measured in Zobel's solution.

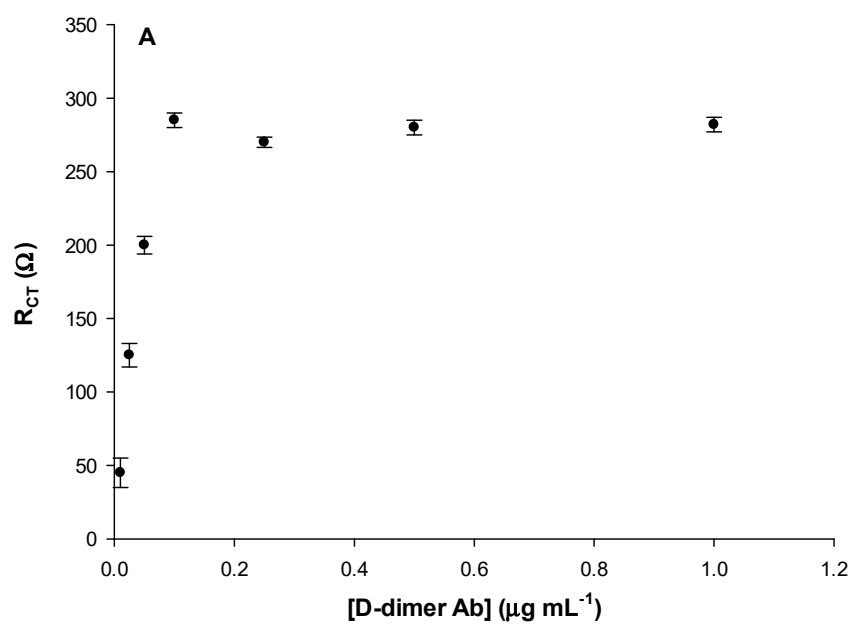

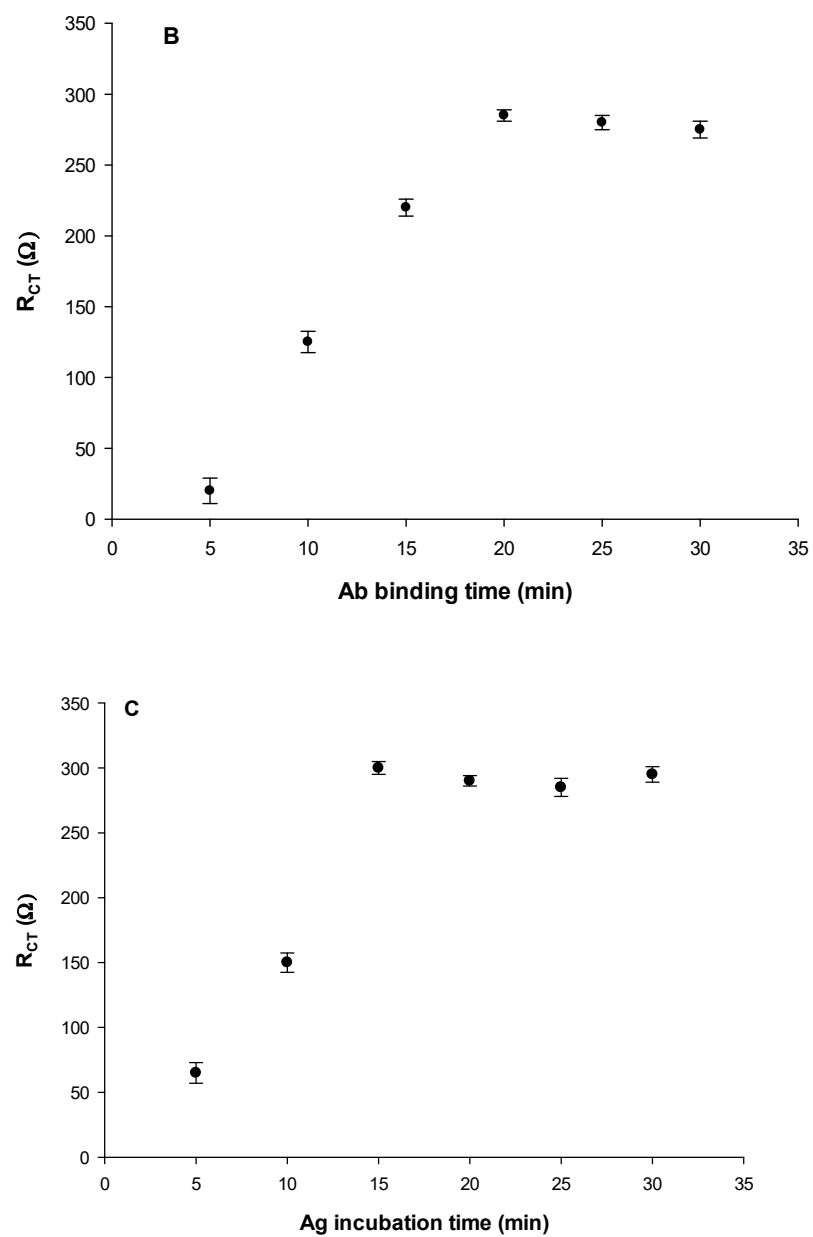

**Figure S3.** Optimization of: (A) D-dimer antibody concentration; (B) antibody binding time; (C) antigen incubation time. Experimental conditions: Zobel's solution; frequency range: 0.1-105 Hz; AC signal amplitude: 10 mV.

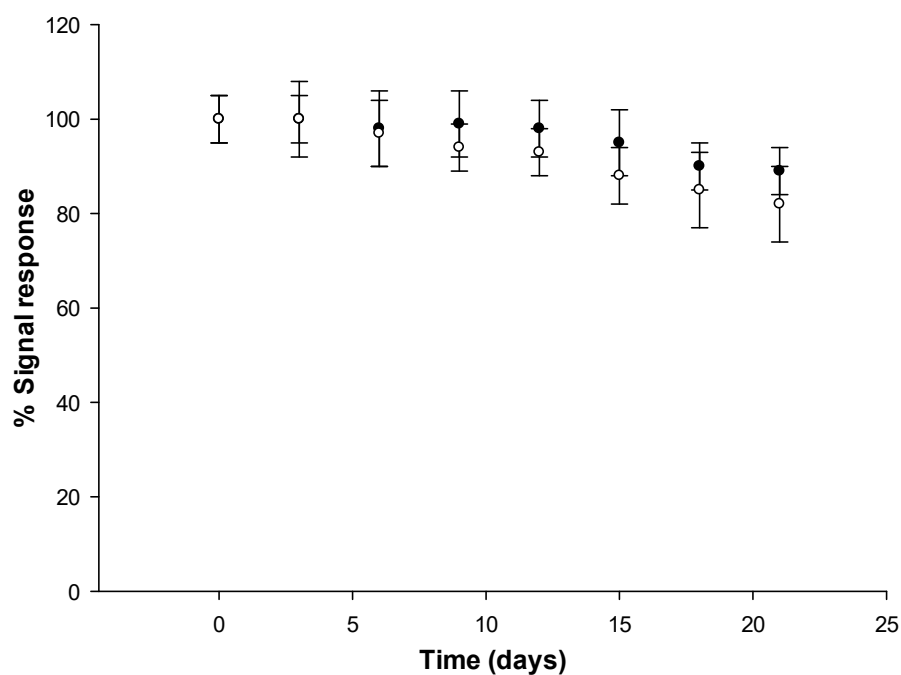

**Figure S4.** Stability assay of the D-dimer immunosensor for standard solution (●) and for human plasma sample (patient 4, ○). Experimental conditions: Zobell's solution; potential applied: 0.150 V (vs. Ag/AgCl).

**Table S1.** Riproducibility and repeatability measurements and parameters for one human plasma sample (patient 4).

| Platform | Measure |      |      |      |      | mean | SD   | CV  |
|----------|---------|------|------|------|------|------|------|-----|
|          | 1       | 2    | 3    | 4    | 5    |      |      |     |
| 1        | 839     | 887  | 856  | 887  | 873  | 868  | 20.8 | 2.4 |
| 2        | 856     | 858  | 894  | 834  | 844  | 857  | 22.7 | 2.7 |
| 3        | 903     | 852  | 843  | 900  | 883  | 876  | 27.5 | 3.1 |
| 4        | 886     | 886  | 851  | 888  | 856  | 873  | 18.3 | 2.1 |
| 5        | 835     | 828  | 899  | 844  | 879  | 857  | 30.6 | 3.6 |
| mean     | 864     | 862  | 869  | 871  | 867  |      |      |     |
| SD       | 29.7    | 24.9 | 25.9 | 29.5 | 16.5 |      |      |     |
| CV       | 3.4     | 2.9  | 3.0  | 3.4  | 1.9  |      |      |     |

\* SD: standard deviation; CV: coefficient of variation (SD/mean\*100).
